# Supplementary material
Source: HighWire-hosted journal article supplement (https://bmjopen.bmj.com/content/10/8/e039856)
Supplement: inline-supplementary-material-1 [file inline-supplementary-material-1.pdf]

1    **Supplementary material 1**

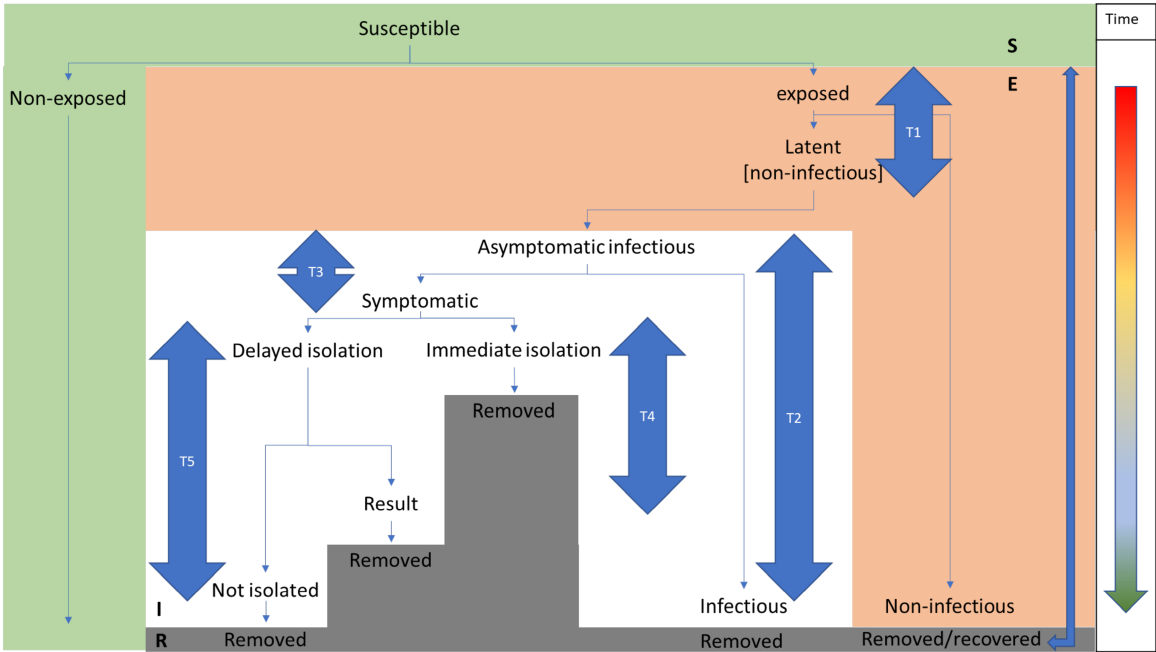

**Figure S1:** Conceptual model of the key temporal parameters impacting COVID-19 infection progression over time. T1: Latent period; T2: Asymptomatic infectious period; T3: Pre-symptomatic infectious period; T4: Symptom onset to diagnosis [self-isolation] or hospitalisation; T5: Symptom onset to removed [death or recovery]

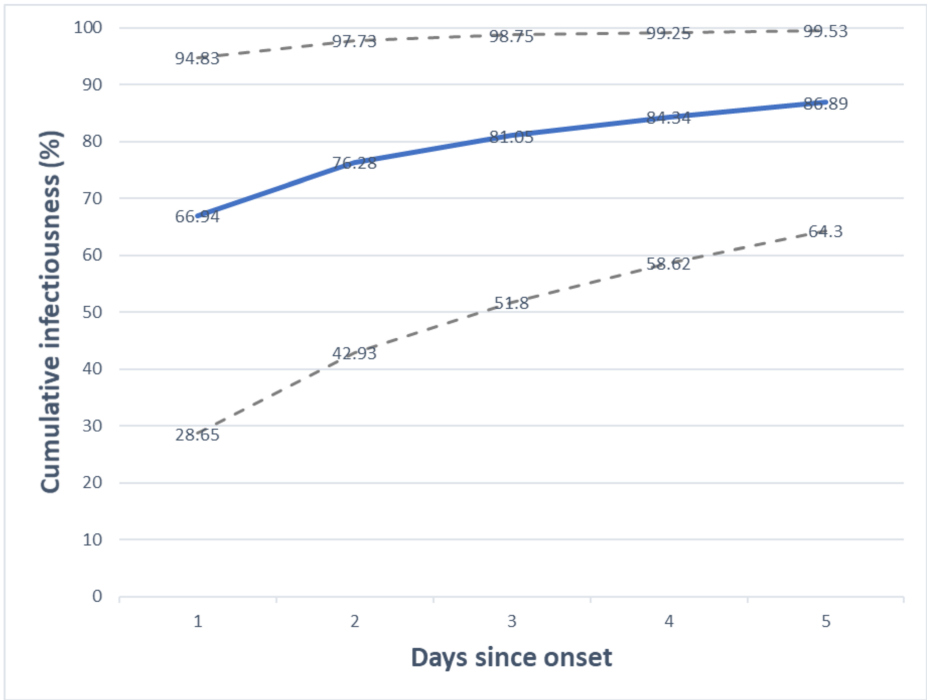

**Figure S2:** Cumulative infectiousness (% of total infectiousness) based on infector-infectee pair data in the paper by Cheng et al. 2020. The accumulation curve is based on a gamma density function, coupled with a probability function to capture the maximal probability if exposed to a primary case.

15

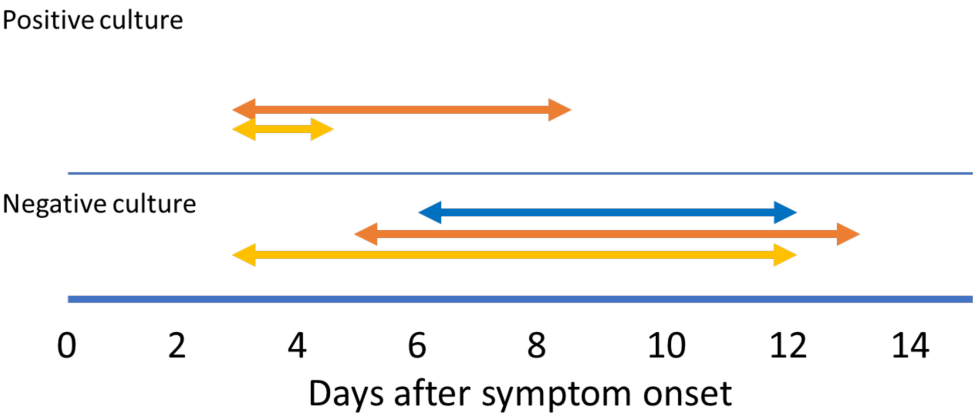

16

17 **Figure S3:** Timeline for positive culture results of SARS-COV2 from throat, sputum and stool  
18 samples; Yellow line = Throat swabs; Orange line = Sputum samples; Blue line = Stool samples;  
19 Adapted from Wölfel et al.[50].

20

21 **Reference:**

22 Cheng, H.Y., Jian, S.W., Liu, D.P., Ng, T.C., Huang, W.T. and Lin, H.H., 2020. High transmissibility of  
23 COVID-19 near symptom onset. *medRxiv*.

24 Wölfel R, Corman VM, Guggemos W, *et al*. Virological assessment of hospitalized  
25 patients with COVID-2019. *Nature* 2020;:1–10.
