# Supplementary material
Source: HighWire-hosted journal article supplement (https://bmjopen.bmj.com/content/10/8/e039856)
Supplement: inline-supplementary-material-2 [file inline-supplementary-material-2.pdf]

| <b>Database</b>                                                                             | <b>Search strategy (publications accessible 1<sup>st</sup> Dec 2019-1<sup>st</sup> April 2020)</b>                                                                                                                                                                                                                                                                                                                                                                                     |
|---------------------------------------------------------------------------------------------|----------------------------------------------------------------------------------------------------------------------------------------------------------------------------------------------------------------------------------------------------------------------------------------------------------------------------------------------------------------------------------------------------------------------------------------------------------------------------------------|
| Pubmed                                                                                      | "coronavirus"[MeSH Terms] OR "coronavirus"[All Fields] OR "COVID-19"<br>Filter: humans<br>Filter: 30 December 2019                                                                                                                                                                                                                                                                                                                                                                     |
| Embase.com                                                                                  | ('coronavirinae'/exp OR 'coronavirinae' OR 'coronaviridae infection'/exp OR 'coronaviridae infection' OR 'coronavirus disease 2019'/exp OR 'coronavirus'/exp OR coronavirus OR 'coronavirus infection'/de) NOT [medline]/lim AND 'human'/de<br>Filter: 30 December 2019                                                                                                                                                                                                                |
| Science direct                                                                              | "COVID-19" OR "2019 novel coronavirus infection" OR "2019-nCoV"                                                                                                                                                                                                                                                                                                                                                                                                                        |
| Cochrane                                                                                    | "coronavirus" OR "COVID-19"                                                                                                                                                                                                                                                                                                                                                                                                                                                            |
| Infectious diseases society of America search of infectious disease journals                | coronavirus OR corona virus OR covid-19<br><a href="https://academic.oup.com/idsa/search-results?allJournals=1&amp;fl_SiteID=5567&amp;page=1&amp;qb=%7b%22ArticleTitle1%22%3a%22coronavirus+OR+corona+virus+OR+covid-19%22%7d&amp;sort=Date+%E2%80%93+Newest+First">https://academic.oup.com/idsa/search-results?allJournals=1&amp;fl_SiteID=5567&amp;page=1&amp;qb=%7b%22ArticleTitle1%22%3a%22coronavirus+OR+corona+virus+OR+covid-19%22%7d&amp;sort=Date+%E2%80%93+Newest+First</a> |
| NHS Evidence                                                                                | "COVID-19" OR "2019 novel coronavirus infection" OR "2019-nCoV"<br>Filter: 30 December 2019                                                                                                                                                                                                                                                                                                                                                                                            |
| Google Scholar                                                                              | "Novel coronavirus" OR "SARS-CoV-2" OR "2019-nCoV" OR "COVID-19" AND "infectious"                                                                                                                                                                                                                                                                                                                                                                                                      |
| <b>Preprint servers (i.e. preliminary reports of work that have not been peer-reviewed)</b> |                                                                                                                                                                                                                                                                                                                                                                                                                                                                                        |
| medRxiv and bioRxiv                                                                         | Pre populated search:<br><a href="https://connect.medrxiv.org/relate/content/181">https://connect.medrxiv.org/relate/content/181</a>                                                                                                                                                                                                                                                                                                                                                   |
| HRB Open                                                                                    | "coronavirus" OR "COVID-19"                                                                                                                                                                                                                                                                                                                                                                                                                                                            |
