# Supplementary material
Source: HighWire-hosted journal article supplement (https://bmjopen.bmj.com/content/10/8/e039856)
Supplement: inline-supplementary-material-3 [file inline-supplementary-material-3.pdf]

## 26 Supplementary material 2:Data for meta-analysis

| paper                      | country         | ct | ct_type | range            | median | iqr            | min | max | first_qt | third_qt | n   | mean | sd | se | severity          | sev_bin | kid_cat |
|----------------------------|-----------------|----|---------|------------------|--------|----------------|-----|-----|----------|----------|-----|------|----|----|-------------------|---------|---------|
| Cai et al. (2020a)         | China           | 12 | Median  | 6-22<br>range    | 12     |                | 6   | 22  | 8        | 15       | 10  | 12   | 6  | 2  | mild              | 0       | 1       |
| Cai et al. (2020b)         | China           | 14 | Median  |                  | 14     | 9-19<br>(IQR)  |     |     | 9        | 19       | 298 | 14   | 7  | 0  | mild-<br>severe   | 1       | 2       |
| Chen et al (2020)          | China           | 12 | Max.    |                  |        |                |     |     |          |          | 1   | 12   | 0  | 0  |                   |         | 2       |
| Chen J. et al.<br>(2020)   | China           | 11 | Median  | 10-12<br>(95%CI) | 11     |                |     |     |          |          | 242 | 11   | 8  | 3  | mild-<br>severe   | 1       | 2       |
| Cheng et al.<br>(2020)     | China           | 21 | Max.    |                  |        |                |     |     |          |          | 1   | 21   | 0  | 0  | severe            | 1       | 2       |
| Fang et al.<br>(2020a)     | China           | 16 | Mean    | 6.7 (sd)         |        |                |     |     |          |          | 24  | 16   | 7  | 1  | mild-<br>moderate | 0       | 2       |
| Fang et al.<br>(2020b)     | China           | 22 | Mean    | 3.6 (sd)         |        |                |     |     |          |          | 8   | 22   | 4  | 1  | severe            | 1       | 2       |
| Hill et al. (2020)         | Scotland        | 9  | Max.    |                  |        |                |     |     |          |          | 1   | 9    | 0  | 0  | mild              | 0       | 2       |
| Hu et al. (2020)           | China           | 12 | Median  |                  | 12     | 12-14<br>(IQR) |     |     | 12       | 14       | 5   | 13   | 2  | 1  | mild              | 0       | 2       |
| Kim et al. (2020)          | Korea           | 16 | Median  | 14-17<br>(range) | 16     |                | 14  | 17  |          |          | 2   | 16   | 3  | 2  | mild-<br>moderate | 0       | 2       |
| Kujawski et al.<br>(2020)  | USA             | 26 | Max.    |                  |        |                |     |     |          |          | 1   | 26   | 0  | 0  | mild-<br>moderate | 0       | 2       |
| Le et al. (2020)           | Vietnam         | 12 | Max.    |                  |        |                |     |     |          |          | 1   | 12   | 0  | 0  | mild              | 0       | 1       |
| Lee et al. (2020)          | Taiwan<br>South | 20 | Max.    |                  |        |                |     |     |          |          | 1   | 20   | 0  | 0  | severe            | 1       | 2       |
| Lim et al. (2020)          | Korea           | 16 | Max.    |                  |        |                |     |     |          |          | 1   | 16   | 0  | 0  |                   |         | 2       |
| Ling et al. (2020)         | China           | 10 | Median  | 2-22<br>(range)  | 10     |                | 2   | 22  | 6        | 11       | 66  | 10   | 4  | 0  |                   |         | 1       |
| Liu et al. (2020)          | China           | 11 | Median  | 7-18<br>range    | 11     |                | 7   | 18  | 10       | 13       | 10  | 12   | 3  | 1  | mild-<br>severe   | 1       | 2       |
| Liu et al. (2020)          | China           | 10 | Max.    |                  |        |                |     |     |          |          | 76  | 10   |    |    | mild-<br>severe   | 1       | 2       |
| Marchand-<br>Senžca et al. | Canada          | 23 | Max     |                  |        |                |     |     |          |          | 1   | 23   | 0  | 0  |                   |         |         |

(2020)

|                          |           |    |        |               |    |   |    |    |     |    |   |                   |        |   |   |
|--------------------------|-----------|----|--------|---------------|----|---|----|----|-----|----|---|-------------------|--------|---|---|
| Pan et al. (2020)        | China     | 10 | Median | 8-12<br>range | 10 | 8 | 12 | 2  | 10  | 3  | 2 |                   |        |   |   |
| Qiu et al. (2020)        | China     | 10 | Mean   | 7-22<br>range |    | 7 | 22 | 36 | 10  | 4  | 1 | mild-<br>moderate | 0      | 1 |   |
| Qu et al. (2020)         | China     | 22 | Max    |               |    |   |    | 1  | 22  | 0  | 0 |                   |        |   |   |
| Tan et al. (2020)        | Vietnam   | 16 | Max    |               |    |   |    | 1  | 16  | 0  | 0 | severe            | 1      |   |   |
| Thevarajan et al. (2020) | Australia | 7  | Max    |               |    |   |    | 1  | 7   | 0  | 0 | mild-<br>moderate | 0      |   |   |
| To et al. (2020)         | Hong Kong | 25 | Max.   |               |    |   |    | 7  | 25  | 0  | 0 | mild-<br>severe   | 1      | 2 |   |
| Wu et al. (2020)         | China     | 16 | Mean   | 6.7 (sd)      |    |   |    | 74 | 16  | 7  | 1 | mild-<br>severe   | 1      | 2 |   |
| Xing et al (2020)        | China     | 14 | Median |               | 14 |   |    | 3  |     |    |   | mild-<br>moderate | 0      | 1 |   |
| Young et al. (2020)      | Singapore | 12 | Median |               | 12 | 1 | 24 | 18 | 12  | 6  | 3 | mild-<br>moderate | 0      | 2 |   |
| Yuan et al. (2020)       | China     | 6  | Median |               | 6  |   | 4  | 10 | 25  | 7  | 5 | mild-<br>moderate | 0      | 1 |   |
| Zhou et al. (2020)       | China     | 20 | Median |               | 20 |   | 16 | 23 | 191 | 20 | 5 | 0                 | severe | 1 | 2 |

27

28

## 29 Supplementary material 3: Data for time to recovery or death

| study   | overall_time_disc_death | death | discharge | xb_t5    | upp95    | low95    |
|---------|-------------------------|-------|-----------|----------|----------|----------|
| kraemer | 20                      | 0     | 1         | 18.06537 | 15.13663 | 20.99411 |
| kraemer | 16                      | 0     | 1         | 18.06537 | 15.13663 | 20.99411 |
| kraemer | 24                      | 0     | 1         | 18.06537 | 15.13663 | 20.99411 |
| kraemer | 24                      | 0     | 1         | 18.06537 | 15.13663 | 20.99411 |
| kraemer | 25                      | 0     | 1         | 18.06537 | 15.13663 | 20.99411 |
| kraemer | 22                      | 0     | 1         | 18.06537 | 15.13663 | 20.99411 |
| kraemer | 28                      | 0     | 1         | 18.06537 | 15.13663 | 20.99411 |
| kraemer | 16                      | 0     | 1         | 18.06537 | 15.13663 | 20.99411 |
| kraemer | 25                      | 0     | 1         | 18.06537 | 15.13663 | 20.99411 |
| kraemer | 37                      | 0     | 1         | 18.06537 | 15.13663 | 20.99411 |
| kraemer | 15                      | 0     | 1         | 18.06537 | 15.13663 | 20.99411 |
| kraemer | 14                      | 0     | 1         | 18.06537 | 15.13663 | 20.99411 |
| kraemer | 26                      | 0     | 1         | 18.06537 | 15.13663 | 20.99411 |
| kraemer | 17                      | 0     | 1         | 18.06537 | 15.13663 | 20.99411 |
| kraemer | 20                      | 0     | 1         | 18.06537 | 15.13663 | 20.99411 |
| kraemer | 14                      | 0     | 1         | 18.06537 | 15.13663 | 20.99411 |
| kraemer | 19                      | 0     | 1         | 18.06537 | 15.13663 | 20.99411 |
| kraemer | 26                      | 0     | 1         | 18.06537 | 15.13663 | 20.99411 |
| kraemer | 28                      | 0     | 1         | 18.06537 | 15.13663 | 20.99411 |
| kraemer | 24                      | 0     | 1         | 18.06537 | 15.13663 | 20.99411 |
| kraemer | 26                      | 0     | 1         | 18.06537 | 15.13663 | 20.99411 |
| kraemer | 8                       | 0     | 1         | 18.06537 | 15.13663 | 20.99411 |
| kraemer | 12                      | 0     | 1         | 18.06537 | 15.13663 | 20.99411 |
| kraemer | 8                       | 0     | 1         | 18.06537 | 15.13663 | 20.99411 |
| kraemer | 18                      | 0     | 1         | 18.06537 | 15.13663 | 20.99411 |
| kraemer | 23                      | 0     | 1         | 18.06537 | 15.13663 | 20.99411 |
| kraemer | 19                      | 0     | 1         | 18.06537 | 15.13663 | 20.99411 |

|         |    |   |   |          |          |          |
|---------|----|---|---|----------|----------|----------|
| kraemer | 3  | 0 | 1 | 18.06537 | 15.13663 | 20.99411 |
| kraemer | 17 | 0 | 1 | 18.06537 | 15.13663 | 20.99411 |
| kraemer | 26 | 0 | 1 | 18.06537 | 15.13663 | 20.99411 |
| kraemer | 19 | 0 | 1 | 18.06537 | 15.13663 | 20.99411 |
| kraemer | 16 | 0 | 1 | 18.06537 | 15.13663 | 20.99411 |
| kraemer | 35 | 0 | 1 | 18.06537 | 15.13663 | 20.99411 |
| kraemer | 14 | 0 | 1 | 18.06537 | 15.13663 | 20.99411 |
| kraemer | 15 | 0 | 1 | 18.06537 | 15.13663 | 20.99411 |
| kraemer | 29 | 0 | 1 | 18.06537 | 15.13663 | 20.99411 |
| kraemer | 30 | 0 | 1 | 18.06537 | 15.13663 | 20.99411 |
| kraemer | 24 | 0 | 1 | 18.06537 | 15.13663 | 20.99411 |
| kraemer | 32 | 0 | 1 | 18.06537 | 15.13663 | 20.99411 |
| kraemer | 15 | 0 | 1 | 18.06537 | 15.13663 | 20.99411 |
| kraemer | 24 | 0 | 1 | 18.06537 | 15.13663 | 20.99411 |
| kraemer | 9  | 0 | 1 | 18.06537 | 15.13663 | 20.99411 |
| kraemer | 18 | 0 | 1 | 18.06537 | 15.13663 | 20.99411 |
| kraemer | 16 | 0 | 1 | 18.06537 | 15.13663 | 20.99411 |
| kraemer | 33 | 0 | 1 | 18.06537 | 15.13663 | 20.99411 |
| kraemer | 18 | 0 | 1 | 18.06537 | 15.13663 | 20.99411 |
| kraemer | 21 | 0 | 1 | 18.06537 | 15.13663 | 20.99411 |
| kraemer | 19 | 0 | 1 | 18.06537 | 15.13663 | 20.99411 |
| kraemer | 7  | 0 | 1 | 18.06537 | 15.13663 | 20.99411 |
| kraemer | 18 | 0 | 1 | 18.06537 | 15.13663 | 20.99411 |
| kraemer | 30 | 0 | 1 | 18.06537 | 15.13663 | 20.99411 |
| kraemer | 27 | 0 | 1 | 18.06537 | 15.13663 | 20.99411 |
| kraemer | 20 | 0 | 1 | 18.06537 | 15.13663 | 20.99411 |
| kraemer | 33 | 0 | 1 | 18.06537 | 15.13663 | 20.99411 |
| kraemer | 15 | 0 | 1 | 18.06537 | 15.13663 | 20.99411 |
| kraemer | 5  | 0 | 1 | 18.06537 | 15.13663 | 20.99411 |
| kraemer | 16 | 0 | 1 | 18.06537 | 15.13663 | 20.99411 |

|         |    |   |   |          |          |          |
|---------|----|---|---|----------|----------|----------|
| kraemer | 14 | 0 | 1 | 18.06537 | 15.13663 | 20.99411 |
| kraemer | 21 | 0 | 1 | 18.06537 | 15.13663 | 20.99411 |
| kraemer | 15 | 0 | 1 | 18.06537 | 15.13663 | 20.99411 |
| kraemer | 26 | 0 | 1 | 18.06537 | 15.13663 | 20.99411 |
| kraemer | 17 | 0 | 1 | 18.06537 | 15.13663 | 20.99411 |
| kraemer | 17 | 0 | 1 | 18.06537 | 15.13663 | 20.99411 |
| kraemer | 16 | 0 | 1 | 18.06537 | 15.13663 | 20.99411 |
| kraemer | 16 | 0 | 1 | 18.06537 | 15.13663 | 20.99411 |
| kraemer | 26 | 0 | 1 | 18.06537 | 15.13663 | 20.99411 |
| kraemer | 19 | 0 | 1 | 18.06537 | 15.13663 | 20.99411 |
| kraemer | 14 | 0 | 1 | 18.06537 | 15.13663 | 20.99411 |
| kraemer | 8  | 0 | 1 | 18.06537 | 15.13663 | 20.99411 |
| kraemer | 34 | 0 | 1 | 18.06537 | 15.13663 | 20.99411 |
| linton  | 10 | 1 | 0 | 18.06537 | 15.13663 | 20.99411 |
| linton  | 21 | 1 | 0 | 18.06537 | 15.13663 | 20.99411 |
| linton  | 8  | 1 | 0 | 18.06537 | 15.13663 | 20.99411 |
| linton  | 11 | 1 | 0 | 18.06537 | 15.13663 | 20.99411 |
| linton  | 11 | 1 | 0 | 18.06537 | 15.13663 | 20.99411 |
| linton  | 30 | 1 | 0 | 18.06537 | 15.13663 | 20.99411 |
| linton  | 32 | 1 | 0 | 18.06537 | 15.13663 | 20.99411 |
| linton  | 10 | 1 | 0 | 18.06537 | 15.13663 | 20.99411 |
| linton  | 19 | 1 | 0 | 18.06537 | 15.13663 | 20.99411 |
| linton  | 19 | 1 | 0 | 18.06537 | 15.13663 | 20.99411 |
| linton  | 14 | 1 | 0 | 18.06537 | 15.13663 | 20.99411 |
| linton  | 8  | 1 | 0 | 18.06537 | 15.13663 | 20.99411 |
| linton  | 12 | 1 | 0 | 18.06537 | 15.13663 | 20.99411 |
| linton  | 12 | 1 | 0 | 18.06537 | 15.13663 | 20.99411 |
| linton  | 20 | 1 | 0 | 18.06537 | 15.13663 | 20.99411 |
| linton  | 12 | 1 | 0 | 18.06537 | 15.13663 | 20.99411 |
| linton  | 7  | 1 | 0 | 18.06537 | 15.13663 | 20.99411 |

|         |    |   |   |          |          |          |
|---------|----|---|---|----------|----------|----------|
| linton  | 11 | 1 | 0 | 18.06537 | 15.13663 | 20.99411 |
| linton  | 16 | 1 | 0 | 18.06537 | 15.13663 | 20.99411 |
| linton  | 6  | 1 | 0 | 18.06537 | 15.13663 | 20.99411 |
| linton  | 6  | 1 | 0 | 18.06537 | 15.13663 | 20.99411 |
| linton  | 17 | 1 | 0 | 18.06537 | 15.13663 | 20.99411 |
| linton  | 15 | 1 | 0 | 18.06537 | 15.13663 | 20.99411 |
| linton  | 24 | 1 | 0 | 18.06537 | 15.13663 | 20.99411 |
| linton  | 41 | 1 | 0 | 18.06537 | 15.13663 | 20.99411 |
| linton  | 10 | 1 | 0 | 18.06537 | 15.13663 | 20.99411 |
| linton  | 11 | 1 | 0 | 18.06537 | 15.13663 | 20.99411 |
| linton  | 13 | 1 | 0 | 18.06537 | 15.13663 | 20.99411 |
| linton  | 13 | 1 | 0 | 18.06537 | 15.13663 | 20.99411 |
| linton  | 16 | 1 | 0 | 18.06537 | 15.13663 | 20.99411 |
| linton  | 13 | 1 | 0 | 18.06537 | 15.13663 | 20.99411 |
| linton  | 14 | 1 | 0 | 18.06537 | 15.13663 | 20.99411 |
| linton  | 18 | 1 | 0 | 18.06537 | 15.13663 | 20.99411 |
| linton  | 12 | 1 | 0 | 18.06537 | 15.13663 | 20.99411 |
| tindale | 19 | 0 | 1 | 18.06537 | 15.13663 | 20.99411 |
| tindale | 25 | 0 | 1 | 18.06537 | 15.13663 | 20.99411 |
| tindale | 25 | 0 | 1 | 18.06537 | 15.13663 | 20.99411 |
| tindale | 20 | 0 | 1 | 18.06537 | 15.13663 | 20.99411 |
| tindale | 20 | 0 | 1 | 18.06537 | 15.13663 | 20.99411 |
| tindale | 13 | 0 | 1 | 18.06537 | 15.13663 | 20.99411 |
| tindale | 28 | 0 | 1 | 18.06537 | 15.13663 | 20.99411 |
| tindale | 25 | 0 | 1 | 18.06537 | 15.13663 | 20.99411 |
| tindale | 24 | 0 | 1 | 18.06537 | 15.13663 | 20.99411 |
| tindale | 14 | 0 | 1 | 18.06537 | 15.13663 | 20.99411 |
| tindale | 17 | 0 | 1 | 18.06537 | 15.13663 | 20.99411 |
| tindale | 15 | 0 | 1 | 18.06537 | 15.13663 | 20.99411 |
| tindale | 18 | 0 | 1 | 18.06537 | 15.13663 | 20.99411 |

|         |    |   |   |          |          |          |
|---------|----|---|---|----------|----------|----------|
| tindale | 15 | 0 | 1 | 18.06537 | 15.13663 | 20.99411 |
| tindale | 16 | 0 | 1 | 18.06537 | 15.13663 | 20.99411 |
| tindale | 16 | 0 | 1 | 18.06537 | 15.13663 | 20.99411 |
| tindale | 20 | 0 | 1 | 18.06537 | 15.13663 | 20.99411 |
| tindale | 17 | 0 | 1 | 18.06537 | 15.13663 | 20.99411 |
| tindale | 12 | 0 | 1 | 18.06537 | 15.13663 | 20.99411 |
| tindale | 24 | 0 | 1 | 18.06537 | 15.13663 | 20.99411 |
| tindale | 24 | 0 | 1 | 18.06537 | 15.13663 | 20.99411 |
| tindale | 26 | 0 | 1 | 18.06537 | 15.13663 | 20.99411 |
| tindale | 16 | 0 | 1 | 18.06537 | 15.13663 | 20.99411 |
| tindale | 20 | 0 | 1 | 18.06537 | 15.13663 | 20.99411 |
| tindale | 9  | 0 | 1 | 18.06537 | 15.13663 | 20.99411 |
| tindale | 15 | 0 | 1 | 18.06537 | 15.13663 | 20.99411 |
| tindale | 14 | 0 | 1 | 18.06537 | 15.13663 | 20.99411 |
| tindale | 18 | 0 | 1 | 18.06537 | 15.13663 | 20.99411 |
| tindale | 30 | 0 | 1 | 18.06537 | 15.13663 | 20.99411 |
| tindale | 19 | 0 | 1 | 18.06537 | 15.13663 | 20.99411 |
| tindale | 17 | 0 | 1 | 18.06537 | 15.13663 | 20.99411 |
| tindale | 16 | 0 | 1 | 18.06537 | 15.13663 | 20.99411 |
| tindale | 17 | 0 | 1 | 18.06537 | 15.13663 | 20.99411 |
| tindale | 20 | 0 | 1 | 18.06537 | 15.13663 | 20.99411 |
| tindale | 23 | 0 | 1 | 18.06537 | 15.13663 | 20.99411 |
| tindale | 19 | 0 | 1 | 18.06537 | 15.13663 | 20.99411 |
| tindale | 12 | 0 | 1 | 18.06537 | 15.13663 | 20.99411 |
| tindale | 19 | 0 | 1 | 18.06537 | 15.13663 | 20.99411 |
| tindale | 17 | 0 | 1 | 18.06537 | 15.13663 | 20.99411 |
| tindale | 17 | 0 | 1 | 18.06537 | 15.13663 | 20.99411 |
| tindale | 14 | 0 | 1 | 18.06537 | 15.13663 | 20.99411 |
| tindale | 16 | 0 | 1 | 18.06537 | 15.13663 | 20.99411 |
| tindale | 30 | 0 | 1 | 18.06537 | 15.13663 | 20.99411 |

|         |    |   |   |          |          |          |
|---------|----|---|---|----------|----------|----------|
| tindale | 33 | 0 | 1 | 18.06537 | 15.13663 | 20.99411 |
| tindale | 19 | 0 | 1 | 18.06537 | 15.13663 | 20.99411 |
| tindale | 29 | 0 | 1 | 18.06537 | 15.13663 | 20.99411 |
| tindale | 22 | 0 | 1 | 18.06537 | 15.13663 | 20.99411 |
| tindale | 10 | 0 | 1 | 18.06537 | 15.13663 | 20.99411 |
| tindale | 20 | 0 | 1 | 18.06537 | 15.13663 | 20.99411 |
| tindale | 11 | 0 | 1 | 18.06537 | 15.13663 | 20.99411 |
| tindale | 15 | 0 | 1 | 18.06537 | 15.13663 | 20.99411 |
| tindale | 18 | 0 | 1 | 18.06537 | 15.13663 | 20.99411 |
| tindale | 11 | 0 | 1 | 18.06537 | 15.13663 | 20.99411 |
